# Supplementary material for: Acute exacerbation of idiopathic pulmonary fibrosis: a 10-year single-centre retrospective study
Source: PubMed Central journal article supplement — BMJ Open Respir Res. 2018 Oct 9;5(1):e000342. doi: 10.1136/bmjresp-2018-000342 (PMC6203000; doi:10.1136/bmjresp-2018-000342), 2018-10-09
Supplement: bmjresp-2018-000342supp001.pdf [file bmjresp-2018-000342supp001.pdf]

Electronic Table 1 Logistic regression analysis for risk factors associated with in-hospital deaths in \*AE-IPF.

|                                                               | <sup>†</sup> OR | 95% <sup>‡</sup> CI | <i>P</i> value |
|---------------------------------------------------------------|-----------------|---------------------|----------------|
| Age (year)                                                    | 0.96            | 0.87–1.07           | 0.46           |
| <sup>‡</sup> PaO <sub>2</sub> / <sup>§</sup> FiO <sub>2</sub> | 1.00            | 0.99–1.01           | 0.87           |
| **WBC (×10 <sup>3</sup> /μL)                                  | 1.38            | 1.04–1.83           | 0.03           |
| <sup>††</sup> Hb (mg/dL)                                      | 0.51            | 0.30–0.85           | 0.01           |
| <sup>‡‡</sup> CRP (mg/dL)                                     | 1.00            | 0.90–1.13           | 0.94           |
| Antibiotic therapy                                            | 4.89            | 0.39–60.56          | 0.22           |

\*AE-IPF: acute exacerbation of idiopathic pulmonary fibrosis. <sup>†</sup>OR: odds ratio. <sup>‡</sup>CI: confidence interval. <sup>‡</sup>PaO<sub>2</sub>: partial pressure of arterial oxygen. <sup>§</sup>FiO<sub>2</sub>: fraction of inspired oxygen. \*\*WBC: white blood cell count. <sup>††</sup>Hb: haemoglobin. <sup>‡‡</sup>CRP: C-reactive protein.
