# Supplementary material for: Acute exacerbation of idiopathic pulmonary fibrosis: a 10-year single-centre retrospective study
Source: PubMed Central journal article supplement — BMJ Open Respir Res. 2018 Oct 9;5(1):e000342. doi: 10.1136/bmjresp-2018-000342 (PMC6203000; doi:10.1136/bmjresp-2018-000342), 2018-10-09
Supplement: bmjresp-2018-000342supp002.pdf [file bmjresp-2018-000342supp002.pdf]

Electronic Table 2 Comparison of patients' characteristics between survivors and non-survivors in idiopathic group.

|                                        | Survivors (n = 20)     | Non-survivors (n = 22) | P value |
|----------------------------------------|------------------------|------------------------|---------|
| Gender (Male)                          | 17 (85.0)              | 17 (77.3)              | 0.70    |
| Age at *AE-IPF (years)                 | 76.9 ± 3.9             | 77.1 ± 8.3             | 0.93    |
| Comorbid lung cancer                   | 0                      | 3 (13.6)               | 0.23    |
| Home oxygen therapy                    | 9 (45.0)               | 10 (45.5)              | 0.98    |
| <b>Pulmonary function test</b>         |                        |                        |         |
| †VC                                    | 2.2 ± 0.9 n = 12       | 2.0 ± 0.6 n = 8        | 0.69    |
| %VC                                    | 67.0 ± 21.4 n = 12     | 60.4 ± 15.3 n = 8      | 0.46    |
| ‡FVC                                   | 1.9 ± 0.6 n = 14       | 2.0 ± 0.7 n = 10       | 0.67    |
| %FVC                                   | 67.2 ± 24.8 n = 14     | 63.8 ± 21.0 n = 10     | 0.73    |
| §FEV1                                  | 1.7 ± 0.7 n = 14       | 1.6 ± 0.5 n = 10       | 0.52    |
| <b>Treatments before *AE-IPF</b>       |                        |                        |         |
| Corticosteroid                         | 6 (30.0)               | 9 (40.9)               | 0.53    |
| Immunosuppressive therapy              | 0                      | 1 (4.5)                | 1.00    |
| Anti-fibrotic therapy                  | 3 (15.0)               | 3 (13.6)               | 1.00    |
| **PPI or ††H <sub>2</sub> B            | 7 (35.0)               | 14 (63.6)              | 0.93    |
| <b>Vital signs</b>                     |                        |                        |         |
| ‡‡PaO <sub>2</sub> /§§FiO <sub>2</sub> | 196.0 ± 73.4 n = 12    | 133.0 ± 63.4 n = 16    | 0.02    |
| Systolic blood pressure (mmHg)         | 131.5 ± 23.0           | 121.4 ± 19.2           | 0.13    |
| Pulse (/min)                           | 96.5 ± 19.2            | 96.5 ± 25.9            | 0.99    |
| Body temperature (°C)                  | 37.1±0.6               | 37.0 ± 0.6             | 0.74    |
| <b>Laboratory data</b>                 |                        |                        |         |
| ***WBC (/μL)                           | 9337.0 ± 3521.5        | 12025.0 ± 4270.2       | 0.03    |
| †††Hb (g/dL)                           | 13.5 ± 1.5             | 11.9 ± 2.2             | 0.01    |
| ‡‡‡Plt (×10 <sup>4</sup> /μL)          | 23.3 ± 8.9             | 23.7 ± 8.2             | 0.86    |
| §§§TP (g/dL)                           | 7.4 ± 0.8              | 7.2 ± 1.1              | 0.56    |
| ****LDH (U/L)                          | 358.9 ± 108.2          | 386.9 ± 119.8          | 0.43    |
| ††††BUN (mg/dL)                        | 14.5 ± 5.6             | 21.5 ± 13.6            | 0.04    |
| ‡‡‡‡Cre (mg/dL)                        | 0.8 ± 0.2              | 1.0 ± 0.9              | 0.43    |
| §§§§CRP (mg/dL)                        | 5.5 ± 5.2              | 11.7 ± 7.3             | < 0.01  |
| *****KL-6 (U/mL)                       | 1699.9 ± 1300.6 n = 19 | 1323.9 ± 575.0 n = 21  | 0.24    |
| †††††SP-D (ng/mL)                      | 260.5 ± 126.2 n = 17   | 534.0 ± 562.1 n = 15   | 0.06    |
| <b>Treatments after AE-IPF</b>         |                        |                        |         |
| Intravenous high-dose steroids         | 15 (75.0)              | 16 (72.7)              | 0.86    |
| Antibiotic therapy                     | 12 (60.0)              | 20 (90.9)              | 0.03    |

---

Data are presented as a number (%) or mean  $\pm$  standard deviation (SD) unless otherwise specified. \*AE-IPF: acute exacerbation of idiopathic pulmonary fibrosis. <sup>†</sup>VC: vital capacity. <sup>‡</sup>FVC: forced vital capacity. <sup>§</sup>FEV1: forced expiratory volume in 1 second. \*\*PPI: proton pump inhibitor. <sup>††</sup>H<sub>2</sub>B: H<sub>2</sub> blocker. <sup>‡‡</sup>PaO<sub>2</sub>: partial pressure of arterial oxygen. <sup>§§</sup>FiO<sub>2</sub>: fraction of inspired oxygen. \*\*\*WBC: white blood cell count. <sup>†††</sup>Hb: haemoglobin. <sup>‡‡‡</sup>Plt: platelets. <sup>§§§</sup>TP: total protein. <sup>\*\*\*\*</sup>LDH: lactate dehydrogenase. <sup>††††</sup>BUN: blood urea nitrogen. <sup>\*\*\*\*</sup>Cre: creatinine. <sup>§§§§</sup>CRP: C-reactive protein. <sup>\*\*\*\*\*</sup>KL-6: Krebs von den Lungen-6. <sup>†††††</sup>SP-D: surfactant protein D.
