# Supplementary material for: Acute exacerbation of idiopathic pulmonary fibrosis: a 10-year single-centre retrospective study
Source: PubMed Central journal article supplement — BMJ Open Respir Res. 2018 Oct 9;5(1):e000342. doi: 10.1136/bmjresp-2018-000342 (PMC6203000; doi:10.1136/bmjresp-2018-000342), 2018-10-09
Supplement: bmjresp-2018-000342supp003.pdf [file bmjresp-2018-000342supp003.pdf]

Electronic Table 3 Logistic regression analysis for risk factors associated with in-hospital deaths in idiopathic group.

|                                      | *OR   | 95% †CI     | <i>P</i> value |
|--------------------------------------|-------|-------------|----------------|
| Age (year)                           | 0.99  | 0.76-1.32   | 0.95           |
| ‡PaO <sub>2</sub> /§FiO <sub>2</sub> | 1.01  | 0.98-1.05   | 0.44           |
| **WBC (×10 <sup>3</sup> /μL)         | 1.87  | 1.09-4.95   | 0.01           |
| ††Hb (mg/dL)                         | 0.26  | 0.04-0.78   | 0.01           |
| ‡‡BUN (mg/dL)                        | 1.02  | 0.88-1.30   | 0.86           |
| §§CRP (mg/dL)                        | 0.98  | 0.79-1.20   | 0.83           |
| Antibiotic therapy                   | 13.35 | 0.40-450.58 | 0.95           |

\*OR: odds ratio. †CI: confidence interval. ‡PaO<sub>2</sub>: partial pressure of arterial oxygen. §FiO<sub>2</sub>: fraction of inspired oxygen. \*\*WBC: white blood cell count. ††Hb: haemoglobin. ‡‡BUN: blood urea nitrogen. §§CRP: C-reactive protein.
