# Supplementary material for: Acute exacerbation of idiopathic pulmonary fibrosis: a 10-year single-centre retrospective study
Source: PubMed Central journal article supplement — BMJ Open Respir Res. 2018 Oct 9;5(1):e000342. doi: 10.1136/bmjresp-2018-000342 (PMC6203000; doi:10.1136/bmjresp-2018-000342), 2018-10-09
Supplement: bmjresp-2018-000342supp004.pdf [file bmjresp-2018-000342supp004.pdf]

Electronic Table 4 Comparison of patients' characteristics between survivors and non-survivors in triggered group.

|                                        | Survivors (n = 9)    | Non-survivors (n = 13) | <i>P</i> value |
|----------------------------------------|----------------------|------------------------|----------------|
| Gender (Male)                          | 8 (88.9)             | 1 (7.7)                | 1.00           |
| Age at *AE-IPF (years)                 | 75.8 ± 7.8           | 74.3 ± 7.6             | 0.67           |
| Comorbid lung cancer                   | 4 (44.4)             | 9 (69.2)               | 0.38           |
| Home oxygen therapy                    | 4 (44.4)             | 3 (23.1)               | 0.38           |
| <b>Pulmonary function test</b>         |                      |                        |                |
| †VC                                    | 2.1 ± 0.8 n = 5      | 1.9 ± 0.8 n = 10       | 0.58           |
| %VC                                    | 63.4 ± 17.4 n = 5    | 58.0 ± 20.8 n = 10     | 0.63           |
| ‡FVC                                   | 2.1 ± 0.8 n = 5      | 2.0 ± 0.7 n = 10       | 0.80           |
| %FVC                                   | 63.5 ± 17.4 n = 5    | 61.5 ± 18.8 n = 10     | 0.85           |
| §FEV1                                  | 1.5 ± 0.8 n = 5      | 1.8 ± 0.6 n = 10       | 0.52           |
| <b>Treatments before *AE-IPF</b>       |                      |                        |                |
| Corticosteroid                         | 1 (11.1)             | 0                      | 0.41           |
| Immunosuppressive therapy              | 1 (11.1)             | 0                      | 0.41           |
| Anti-fibrotic therapy                  | 0                    | 2 (15.4)               | 0.49           |
| **PPI or ††H <sub>2</sub> B            |                      |                        |                |
| <b>Vital signs</b>                     | 1 (11.1)             | 3 (23.1)               | 0.62           |
| ‡‡PaO <sub>2</sub> /§§FiO <sub>2</sub> | 253.7 ± 124.4 n = 9  | 219.7 ± 213.2 n = 9    | 0.69           |
| Systolic blood pressure (mmHg)         | 133.2 ± 26.4         | 130.8 ± 26.4           | 0.80           |
| Pulse (/min)                           | 101.7 ± 17.8         | 100.9 ± 16.9           | 0.92           |
| Body temperature (°C)                  | 37.0 ± 0.5           | 36.8 ± 0.5             | 0.35           |
| <b>Laboratory data</b>                 |                      |                        |                |
| ***WBC (/μL)                           | 9900.0 ± 3151.8      | 12957.7 ± 6167.0       | 0.19           |
| †††Hb (g/dL)                           | 13.6 ± 2.4           | 12.2 ± 2.1             | 0.16           |
| ‡‡‡Plt (×10 <sup>4</sup> /μL)          | 20.6 ± 8.6           | 25.4 ± 9.4             | 0.24           |
| §§§TP (g/dL)                           | 7.3±1.0              | 6.9 ± 0.7              | 0.35           |
| ****LDH (U/L)                          | 347.1 ± 120.1        | 448.8 ± 294.2          | 0.34           |
| ††††BUN (mg/dL)                        | 20.2 ± 9.3           | 22.8 ± 21.8            | 0.75           |
| ‡‡‡‡Cre (mg/dL)                        | 0.8 ± 0.4            | 0.9 ± 0.5              | 0.67           |
| §§§§CRP (mg/dL)                        | 10.9 ± 7.8           | 14.0 ± 9.6             | 0.44           |
| *****KL-6 (U/mL)                       | 1353.4 ± 978.9 n = 7 | 1190.9 ± 1115.7 n = 11 | 0.76           |
| †††††SP-D (ng/mL)                      | 486.7 ± 332.9 n = 5  | 248.8 ± 178.5 n = 8    | 0.12           |
| <b>Treatments after *AE-IPF</b>        |                      |                        |                |
| Intravenous high-dose steroids         | 3 (33.3)             | 8 (61.5)               | 0.39           |
| Antibiotic therapy                     | 8 (88.9)             | 12 (92.3)              | 1.00           |

Azithromycin

2 (22.2)

1 (7.7)

0.54

---

Data are presented as a number (%) or mean  $\pm$  standard deviation (SD) unless otherwise specified. \*AE-IPF: acute exacerbation of idiopathic pulmonary fibrosis. <sup>†</sup>VC: vital capacity. <sup>‡</sup>FVC: forced vital capacity. <sup>§</sup>FEV1: forced expiratory volume in 1 second. \*\*PPI: proton pump inhibitor. <sup>††</sup>H<sub>2</sub>B: H<sub>2</sub> blocker. <sup>†††</sup>PaO<sub>2</sub>: partial pressure of arterial oxygen. <sup>§§</sup>FiO<sub>2</sub>: fraction of inspired oxygen. \*\*\*WBC: white blood cell count. <sup>†††</sup>Hb: haemoglobin. <sup>†††</sup>Plt: platelets. <sup>§§§</sup>TP: total protein. <sup>\*\*\*\*</sup>LDH: lactate dehydrogenase. <sup>††††</sup>BUN: blood urea nitrogen. <sup>\*\*\*\*</sup>Cre: creatinine. <sup>§§§§</sup>CRP: C-reactive protein. <sup>\*\*\*\*\*</sup>KL-6: Krebs von den Lungen-6. <sup>†††††</sup>SP-D: surfactant protein D.
